# Supplementary material for: Fluoxetine-Induced Cortical Adult Neurogenesis
Source: PubMed Central journal article supplement — Neuropsychopharmacology. 2013 Jan 30;38(6):909–20. doi: 10.1038/npp.2013.2 (PMC3629401; doi:10.1038/npp.2013.2), 2013-01-30
Supplement: npp20132x1.pdf [file npp20132x1.pdf]

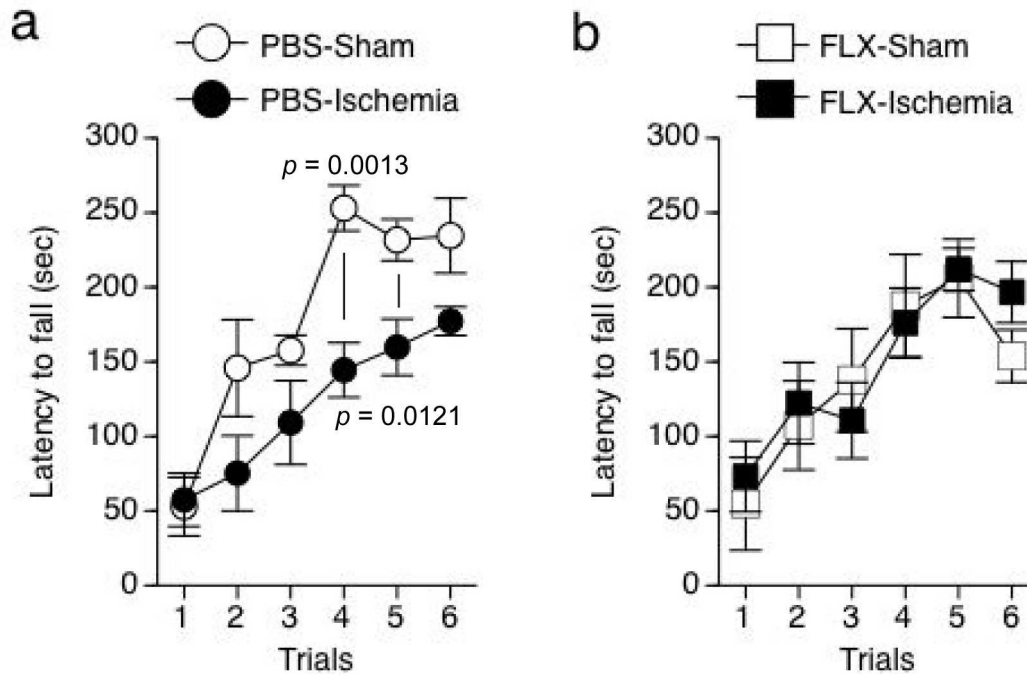

**Supplementary Figure S1. Attenuating effect of FLX treatments on ischemia-induced decrease in latency to fall off rotarod.**

An overall three-way ANOVA including all data showed that there was a tendency in a FLX  $\times$  ischemia interaction ( $F(1,22) = 2.996, p = 0.0975$ ), suggesting that the effect of ischemia is different between FLX-treated and PBS-treated groups. Therefore, we next conducted two-way ANOVA for PBS-treated group and FLX-treated group, separately. In the PBS-treated mice, ischemia treatment significantly reduced latency to fall off rotarod (Supplementary Figure S1a) ( $F(1,9) = 6.239, p = 0.034$ ), and a TRIAL  $\times$  ISCHEMIA interaction was highly significant ( $F(5,45) = 3.6, p = 0.008$ ). Further analysis for each trial revealed that ischemia significantly decreased latency to fall in the trials #4 ( $p = 0.0013$ ) and #5 ( $p = 0.0121$ ). As shown in Supplementary Figure S1b, there was no significant main effect of ischemia on the motor performance in the FLX-treated mice ( $F(1,13) = 0.068, p = 0.7979$ ), nor TRIAL  $\times$  ISCHEMIA interaction ( $F(5,65) = 0.84, p = 0.5265$ ), indicating that ischemia did not impair motor performance under FLX treatment. All data are shown as mean $\pm$ SEM.

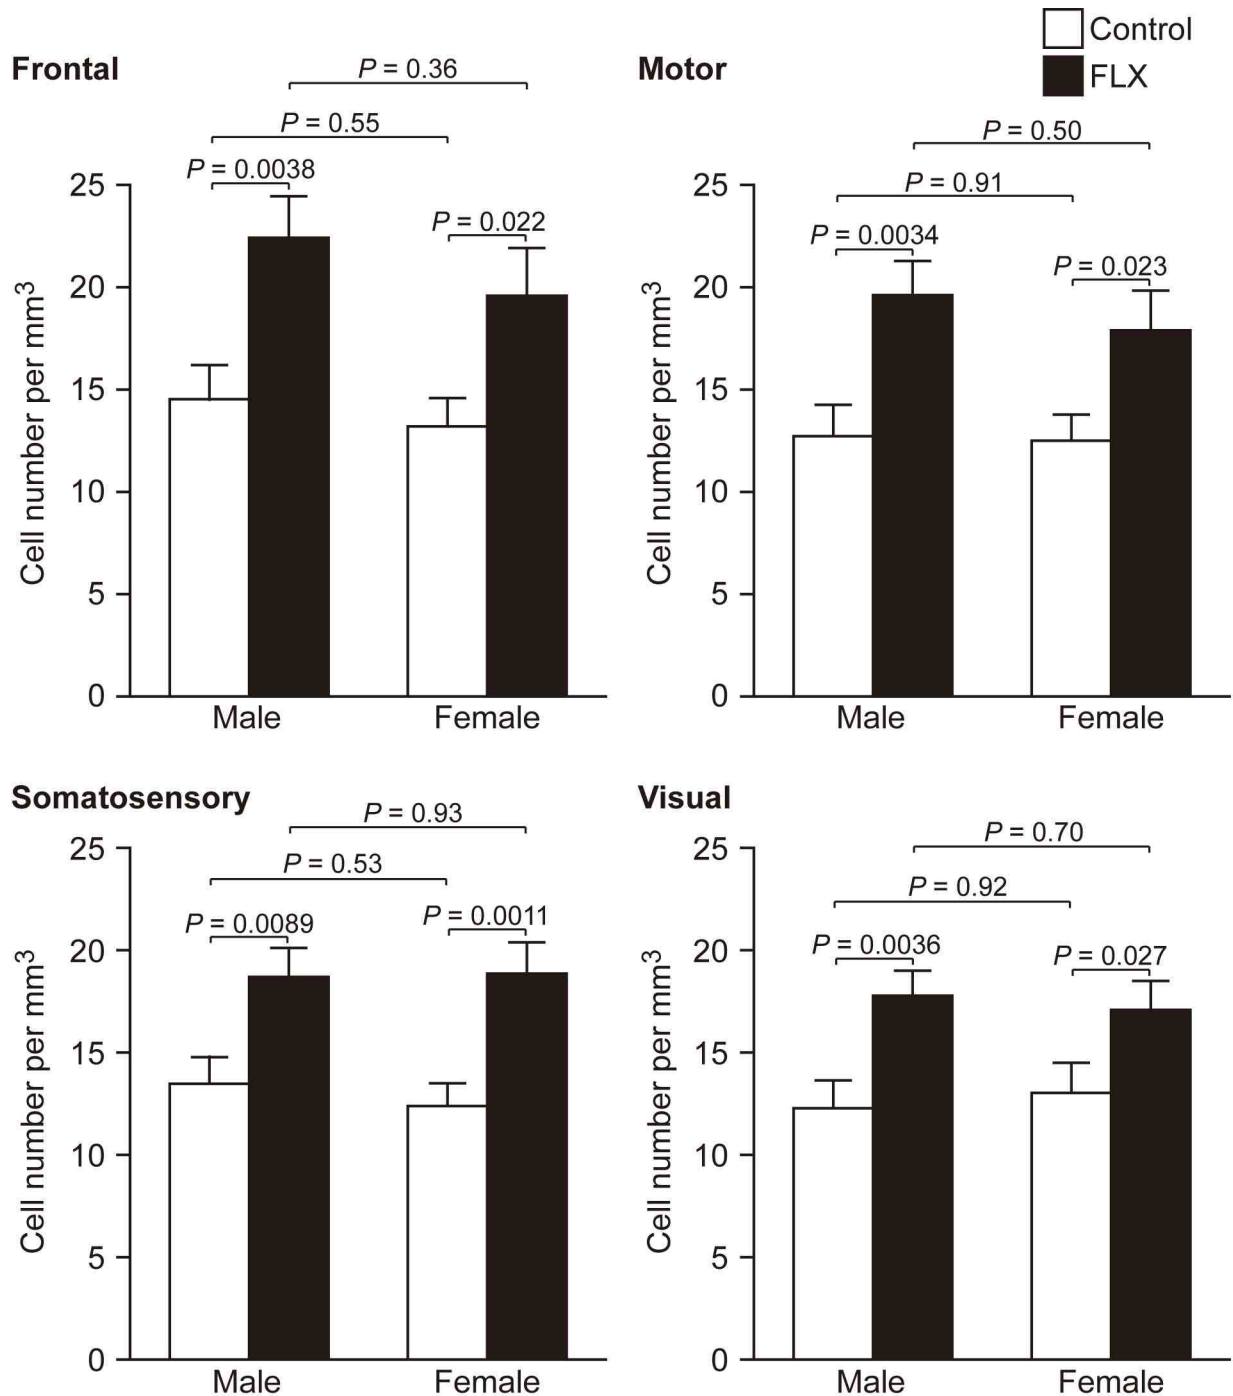

**Supplementary Figure S2. No sex difference in the number of L1-INP cells in layer 1 of FLX-treated mice.**

Both male and female groups were treated with FLX (15 mg/kg/day) for 3 weeks. FLX pellets were subcutaneously embedded into the dorsal interscapular region of mice. In all the cortical regions examined, no significant differences between the male and female groups were observed (two-way ANOVA,  $n = 5$  each). All data are shown as mean  $\pm$  SEM.

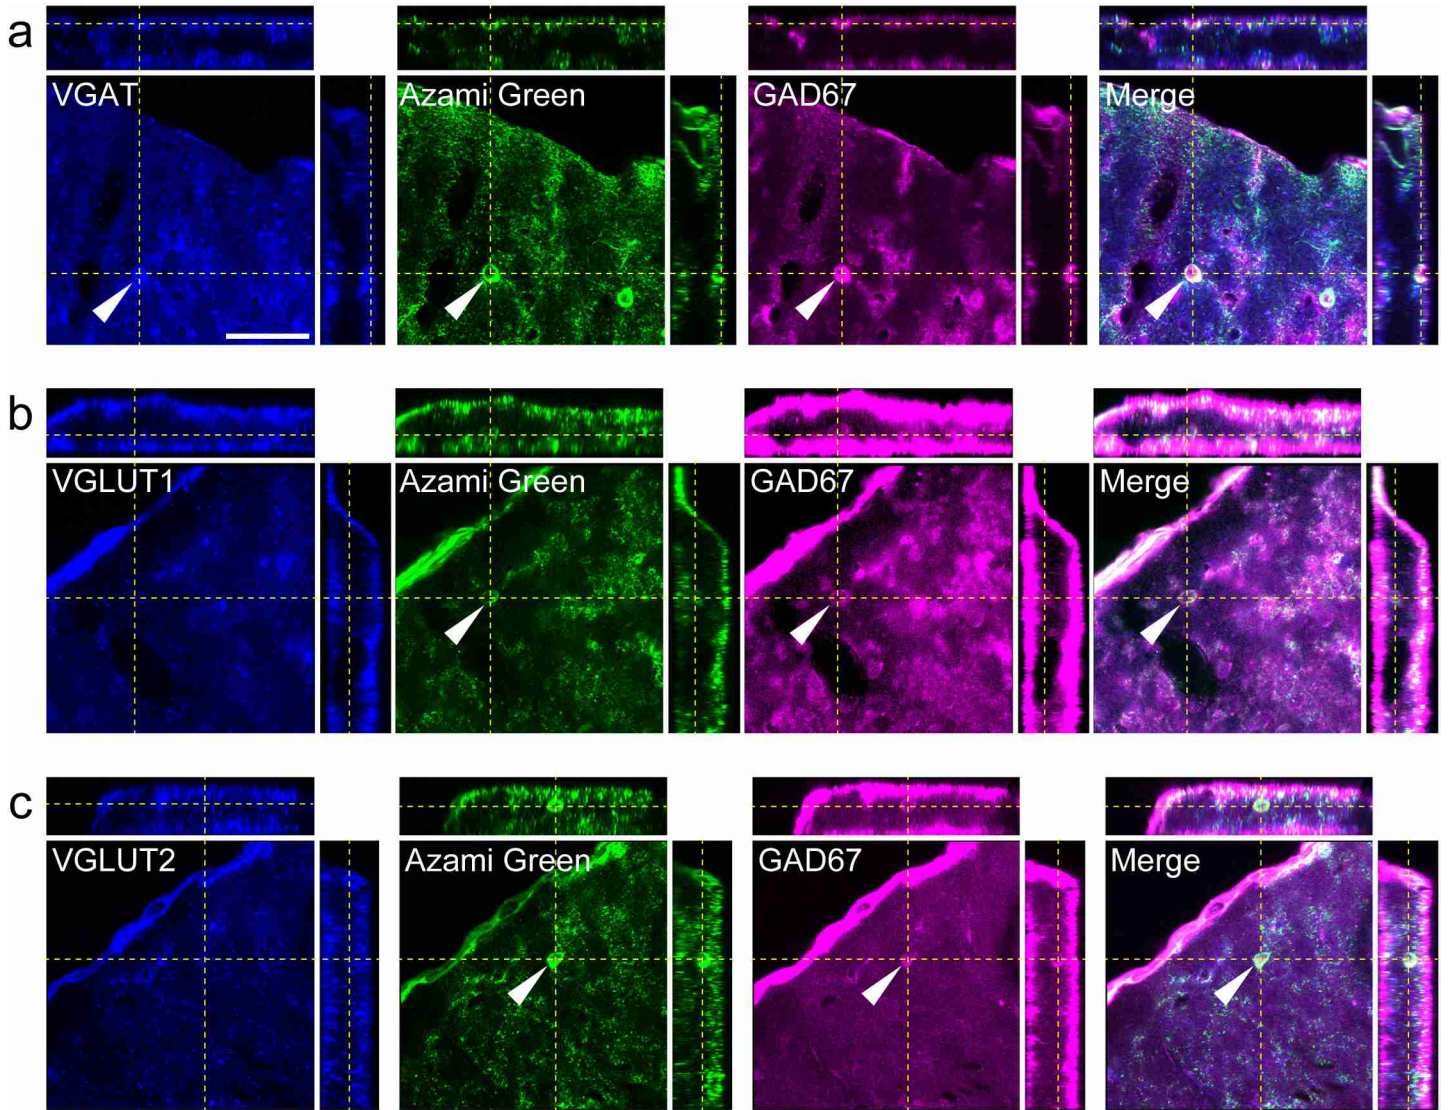

**Supplementary Figure S3. Expression of vesicular GABA transporter in L1-INP cells.** The expressions of vesicular glutamate 1 and 2 (VGLUT) and GABA transporters (VGAT) were examined by triple-labeling immunofluorescence microscopy. L1-INP cells expressed VGAT (a), but neither VGLUT1 (b) nor VGLUT2 (c). Arrowheads means L1-INP cells, which are labeled with Azami Green and GAD67. Scale bar, 50  $\mu\text{m}$ .



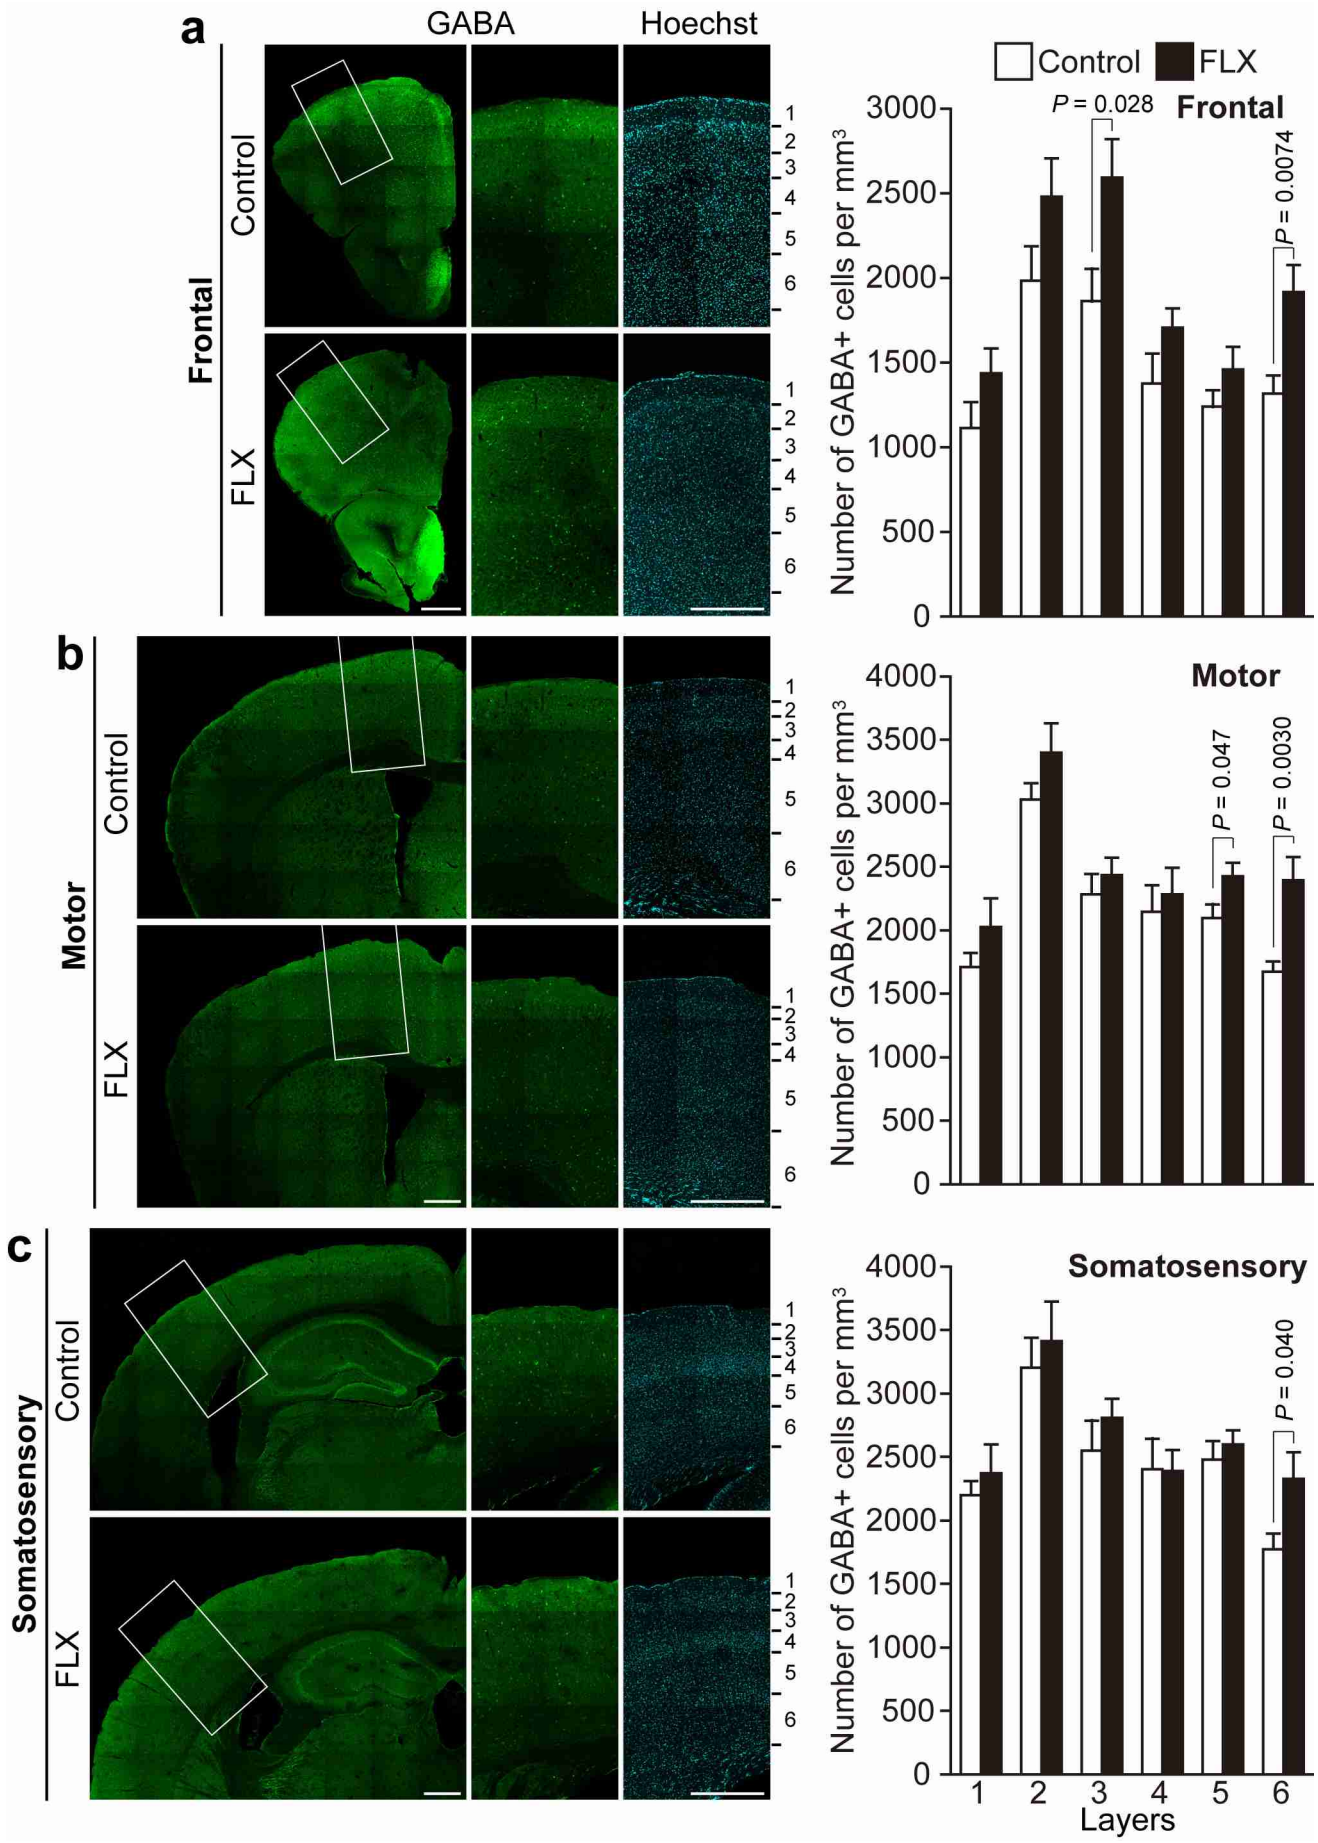

**Supplementary Figure S4. Increases in the number of GABAergic interneurons in the cortex of FLX-treated mice.**

(a-c) Mice were treated with FLX pellets (15 mg/kg/day) for 3 weeks. Brain sections were stained with anti-GABA (green signal). FLX treatments increased the number of GABAergic interneurons in layer 6 (Student's *t* test,  $n = 8$  each). In addition, layer-specific increases in GABAergic interneurons were also found in layer 3 of the frontal cortex (a) and layer 5 of the motor cortex (b). Scale bars, 500  $\mu\text{m}$ .

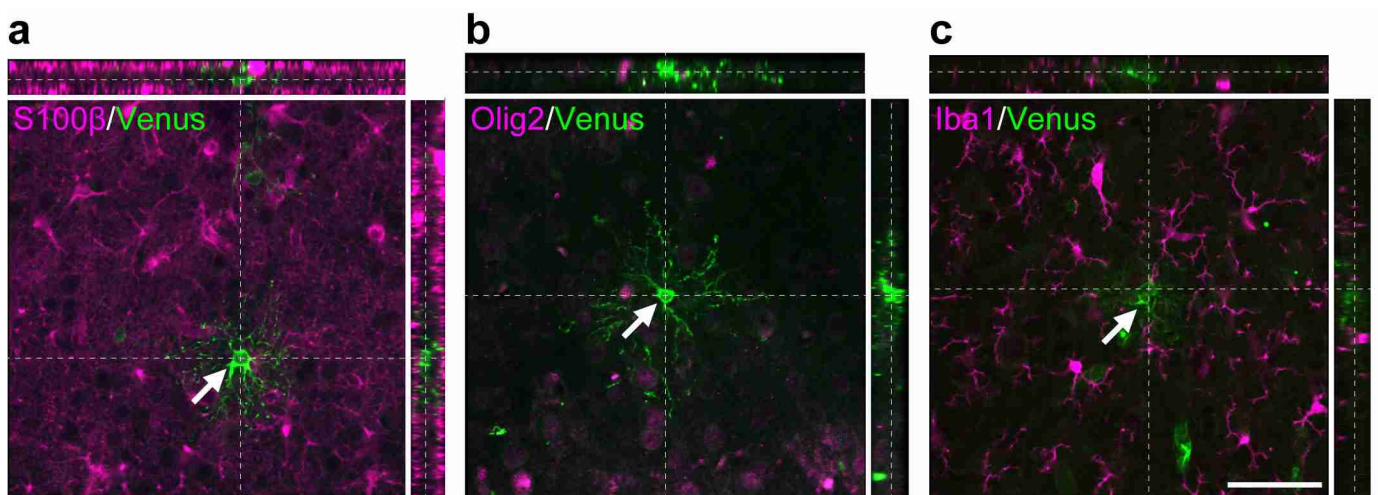

**Supplementary Figure S5. No expression of glial cell markers in neurons derived from L1-INP cells.** L1-INP cells were infected with a retrovirus vector, which expresses Venus reporter proteins under the neuron-specific promoter enhanced synapsin I. At 4 weeks after the FLX treatments (15 mg/kg/day), Venus+ neurons were found in layers 2–6, but they were not co-stained with glial markers, such as astrocyte marker S100 $\beta$  (a), oligodendrocyte lineage marker Olig2 (b), or microglia marker Iba1 (c). Scale bar, 50  $\mu$ m.

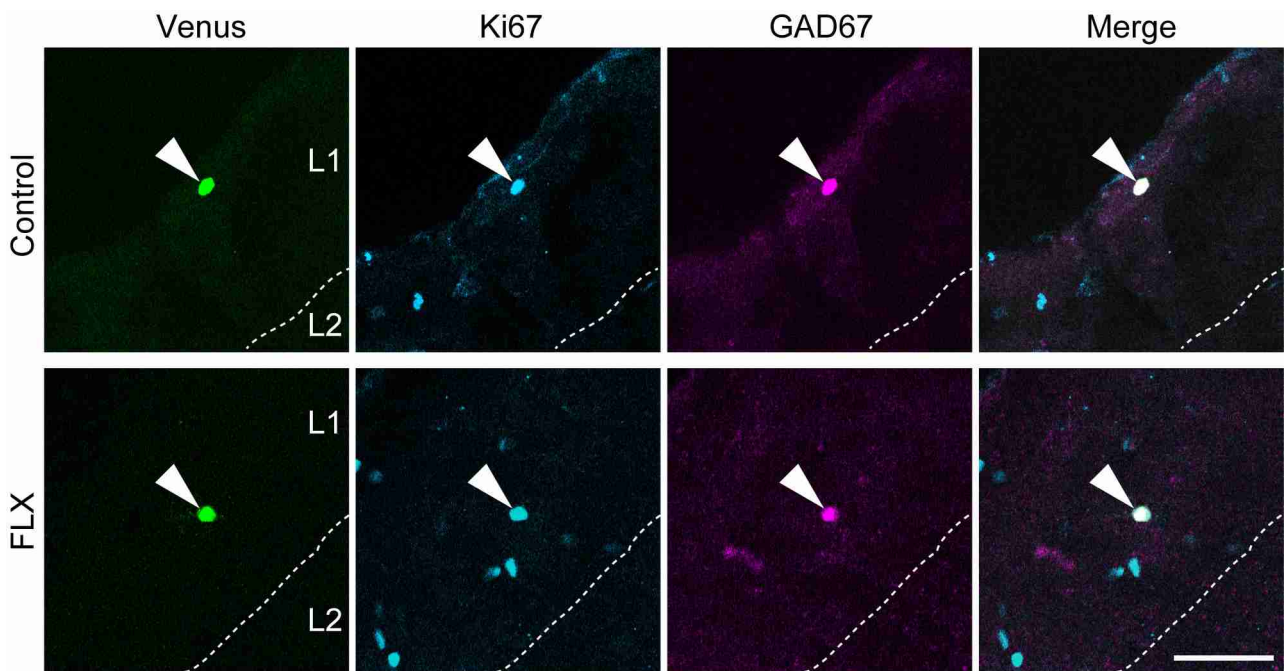

**Supplementary Figure S6. Retrovirus-mediated Venus labeling of L1-INP cells.**

L1-INP cells were labeled with a retrovirus vector, which expresses Venus proteins driven by the neuron-specific promoter enhanced synapsin I. Mice were treated with FLX (15 mg/kg/day) for 3 weeks. Arrowheads indicate the same cells in layer 1 of control (upper) and FLX-treated mice (lower). Scale bar, 50  $\mu$ m.



**a** Number of layer 2–6 Venus+ cells and labeling efficiency  $r$  in the somatosensory cortex of each mouse

| Weeks                              | 4           | 8           |
|------------------------------------|-------------|-------------|
| Control mice                       | 3.06, 0.159 | 2.26, 0.192 |
|                                    | 1.90, 0.128 | 1.48, 0.113 |
|                                    | 2.00, 0.086 | 2.93, 0.114 |
|                                    | 2.51, 0.126 | 2.23, 0.077 |
| FLX-treated mice<br>(15 mg/kg/day) | 16.7, 0.112 | 10.2, 0.137 |
|                                    | 25.9, 0.138 | 12.7, 0.142 |
|                                    | 19.3, 0.117 | 9.66, 0.092 |
|                                    | 23.8, 0.172 | 12.1, 0.132 |

Each cell represents ([number of layer 2–6 Venus+ neurons per mm<sup>3</sup>], [labeling efficiency  $r$ ]) for each mouse.

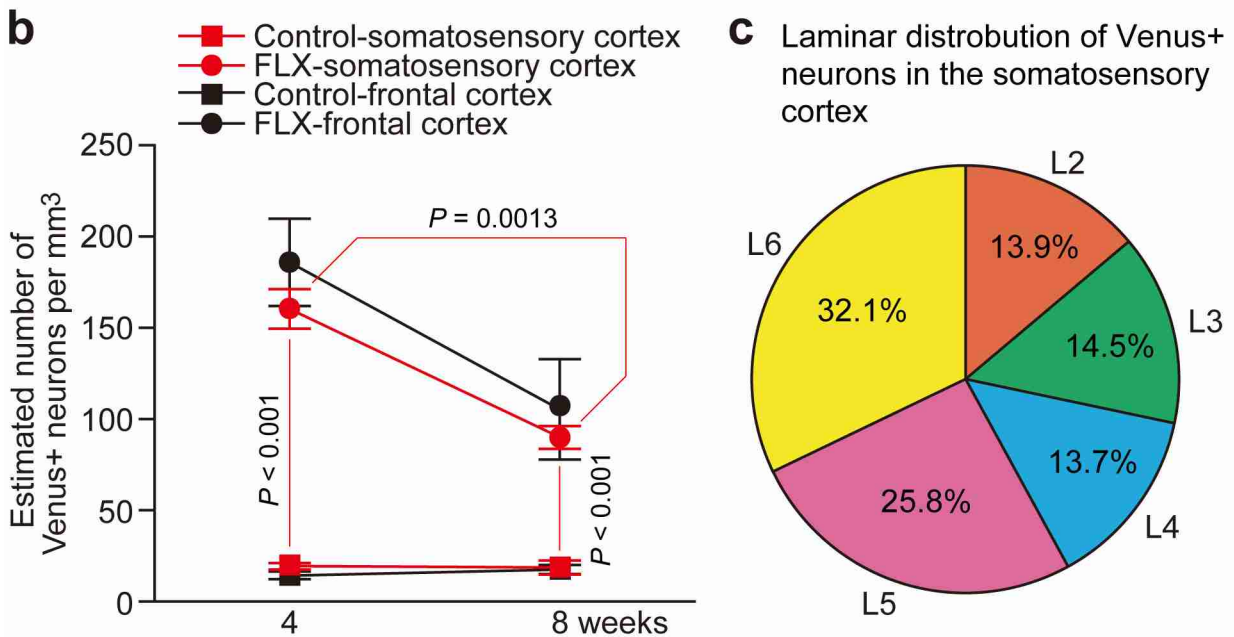

**Supplementary Figure S7. Increase in the number of Venus+ neurons and their laminar distribution in the somatosensory cortex of FLX-treated mice.**

(a) The number of layer 2–6 Venus+ neurons and labeling efficiency  $r$  in the somatosensory cortex 4 and 8 weeks after the last FLX administration. (b) Time-course of the estimated number of layer 2–6 Venus+ cells in the frontal and somatosensory cortex of FLX-treated mice (two-way ANOVA followed by Scheffé's *post hoc* test,  $n = 4$  each). Data from the somatosensory cortex is indicated by red square (control) and circle (FLX). Data from the frontal cortex (black square [control] and circle [FLX]) are identical to those in Fig. 3c. All data are shown as mean  $\pm$  SEM. (c) Laminar distribution of Venus+ neurons in the somatosensory cortex of FLX-treated mice. Data are shown as mean of four mice. L, layer.



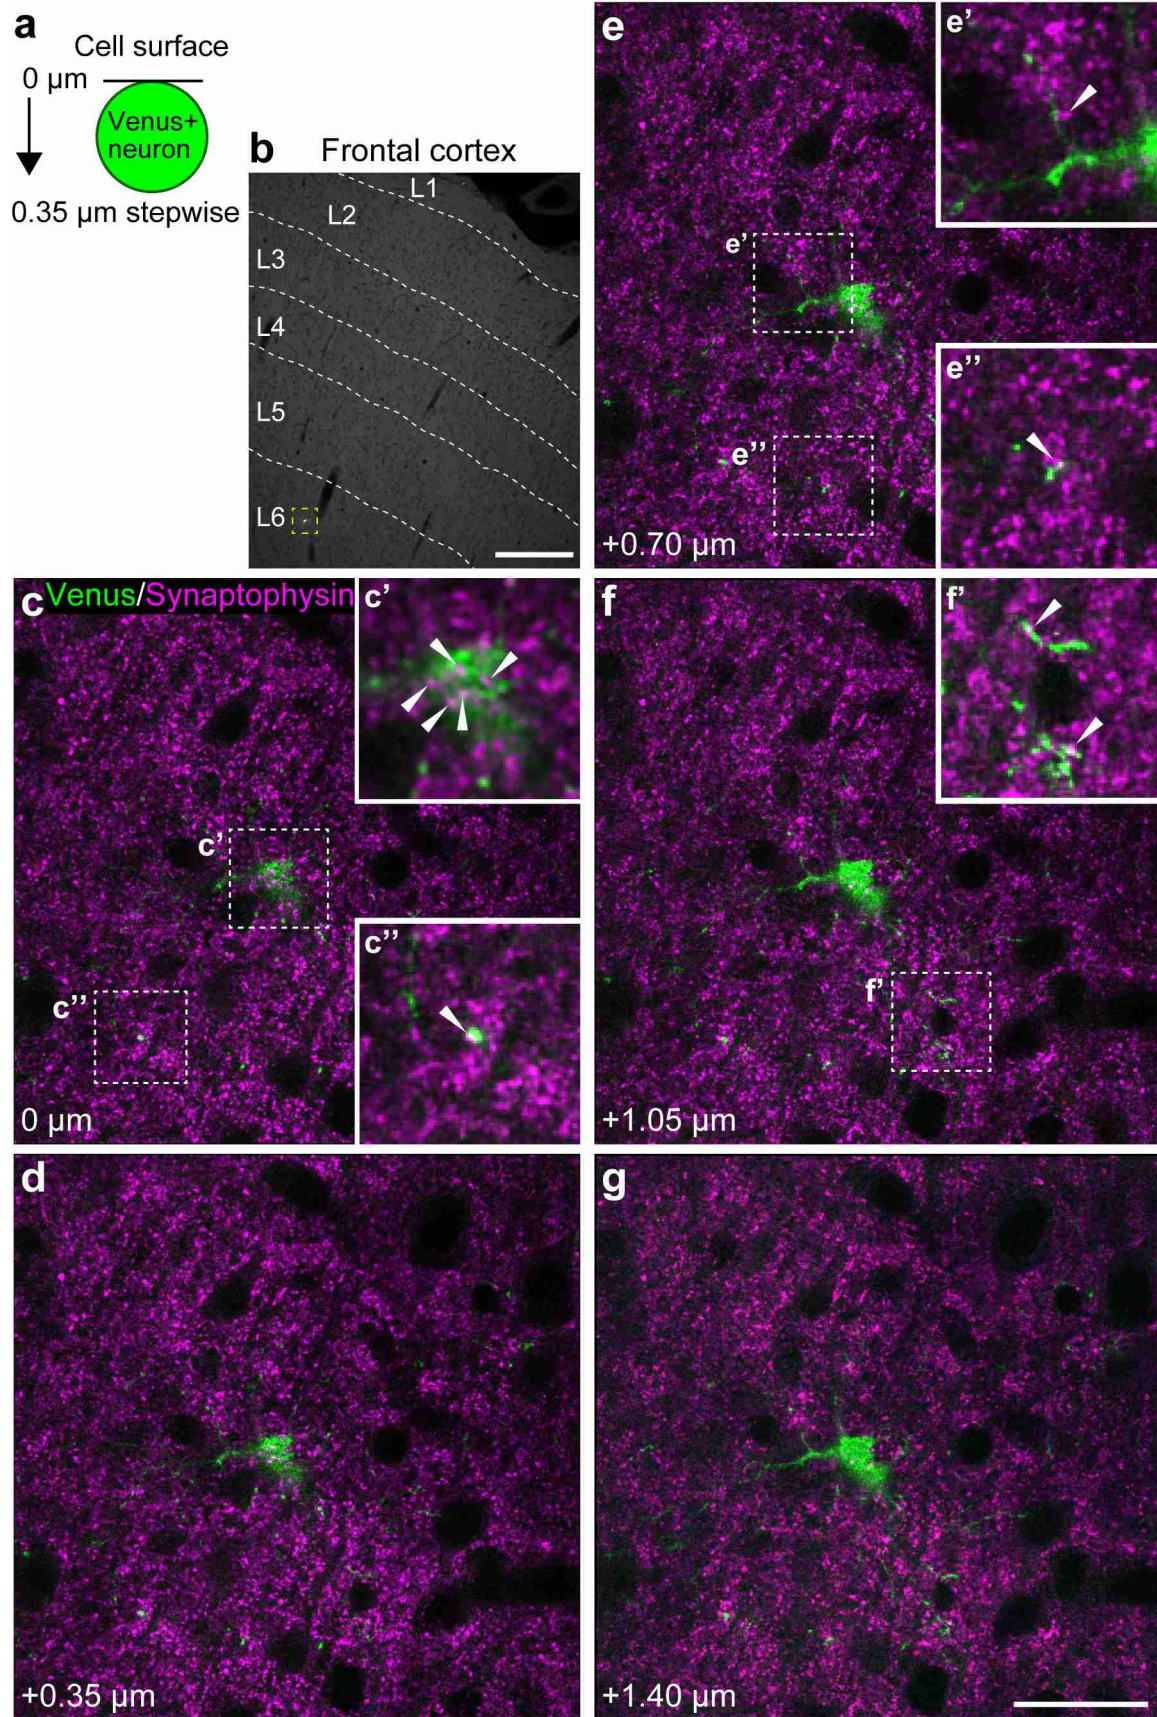

**Supplementary Figure S8. Synaptic inputs to new neurons.**

Synaptophysin was used as a presynaptic marker. (a) Schematic representation of the analysis. (b) Cell images were taken from layer 6 of the frontal cortex 4 weeks after 3 weeks-FLX treatments (15 mg/kg/day). (c-g) A z-series analysis revealed that the synaptophysin-labeled presynaptic structures (arrowheads) were in close apposition with a different focal plane of the Venus+ neuron. Scale bars, 300  $\mu\text{m}$  (b), 30  $\mu\text{m}$  (c-g).



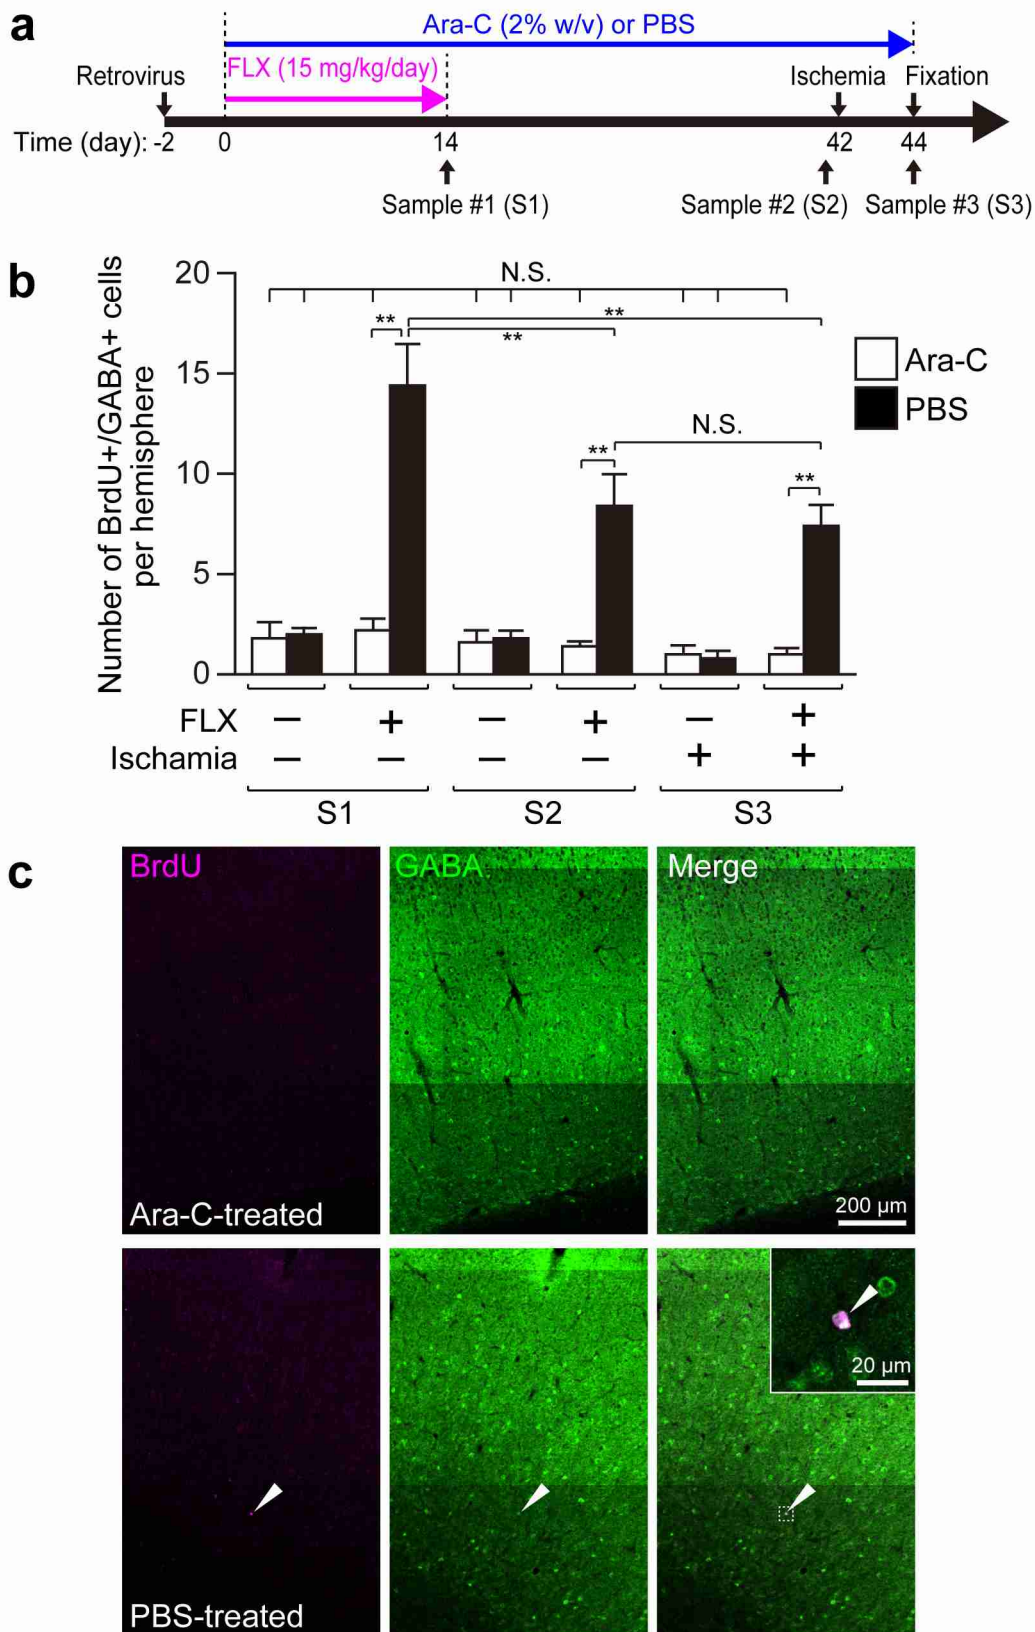

**Supplementary Figure S9. Quantification of the number of BrdU+/GABA+ cells before and after ischemia.** (a) Time course experiments. (b) Quantification of the number of BrdU+/GABA+ cells in the Ara-C- and PBS-treated hemispheres before and after ischemia. S1, sample #1; S2, sample #2; S3, sample #3, as shown in (a). All data are shown as mean  $\pm$  SEM (\*\*P < 0.01; two-way ANOVA followed by Scheffé's post hoc test, n = 4 each). N.S., not significant. (c) Representative images of S3, which were treated with FLX. Tissue sections were stained with anti-BrdU (magenta) and anti-GABA (green). Arrowhead indicates a BrdU+/GABA+ cell.

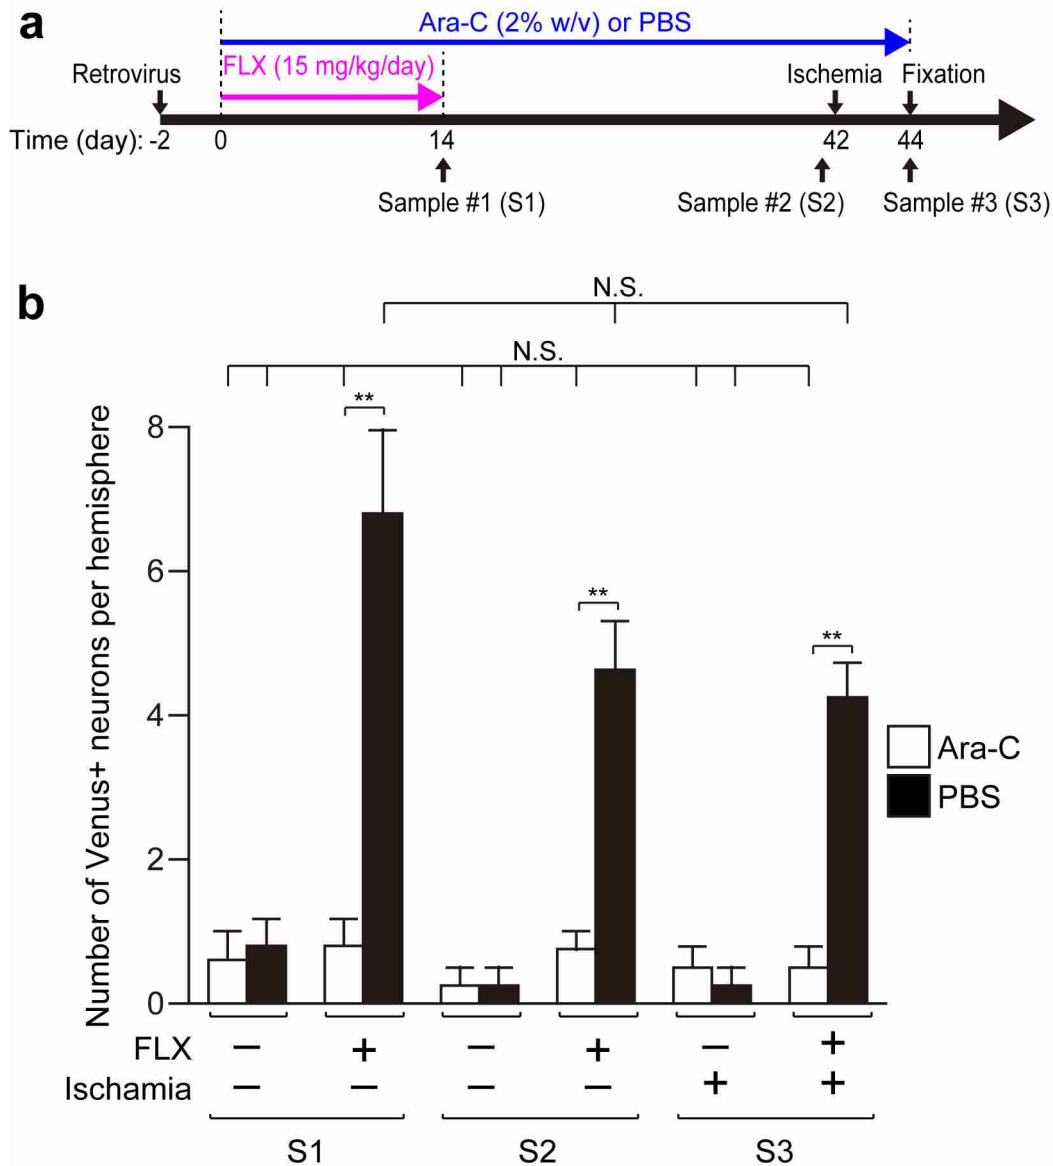

**Supplementary Figure S10. No changes in the number of Venus+ neurons before and after ischemia.** (a) Time course experiments. (b) Quantification of the number of Venus+ neurons in the Ara-C- and PBS-treated hemispheres before and after ischemia. S1, sample #1; S2, sample #2; S3, sample #3, as shown in (a). All data are shown as mean  $\pm$  SEM (\*\* $P < 0.01$ ; two-way ANOVA followed by Scheffé's post hoc test,  $n = 4$  each). N.S., not significant.



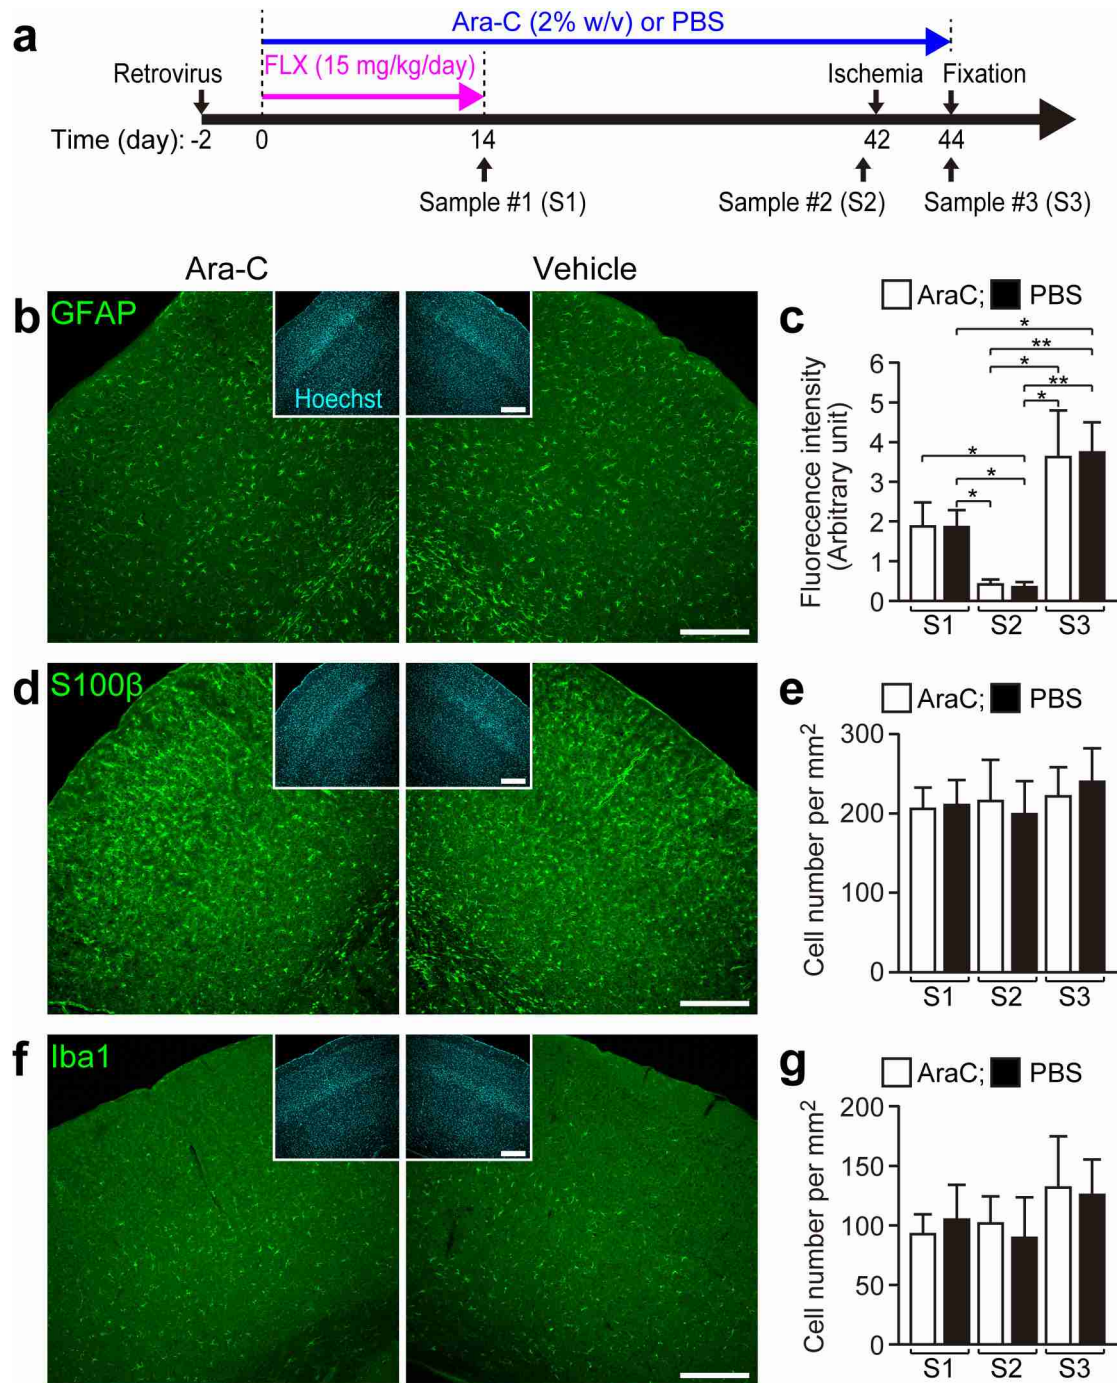

**Supplementary Figure S11. Involvement of glial cells in neuroprotective effects.**

(a) Time course experiments. Glial activation was evaluated with the expressions of GFAP, astrocyte activation (b and c); S100 $\beta$ , cell number of astrocytes (d and e); and Iba1, microglia activation (f and g). S1, sample #1; S2, sample #2; S3, sample #3, as shown in a. All sections were counter-stained with Hoechst to assess the cytoarchitecture (inset). All data are shown as mean  $\pm$  SEM (\* $P$  < 0.05, \*\* $P$  < 0.01; two-way ANOVA followed by Scheffé's post hoc test,  $n$  = 4 each). Scale bars, 250  $\mu$ m.

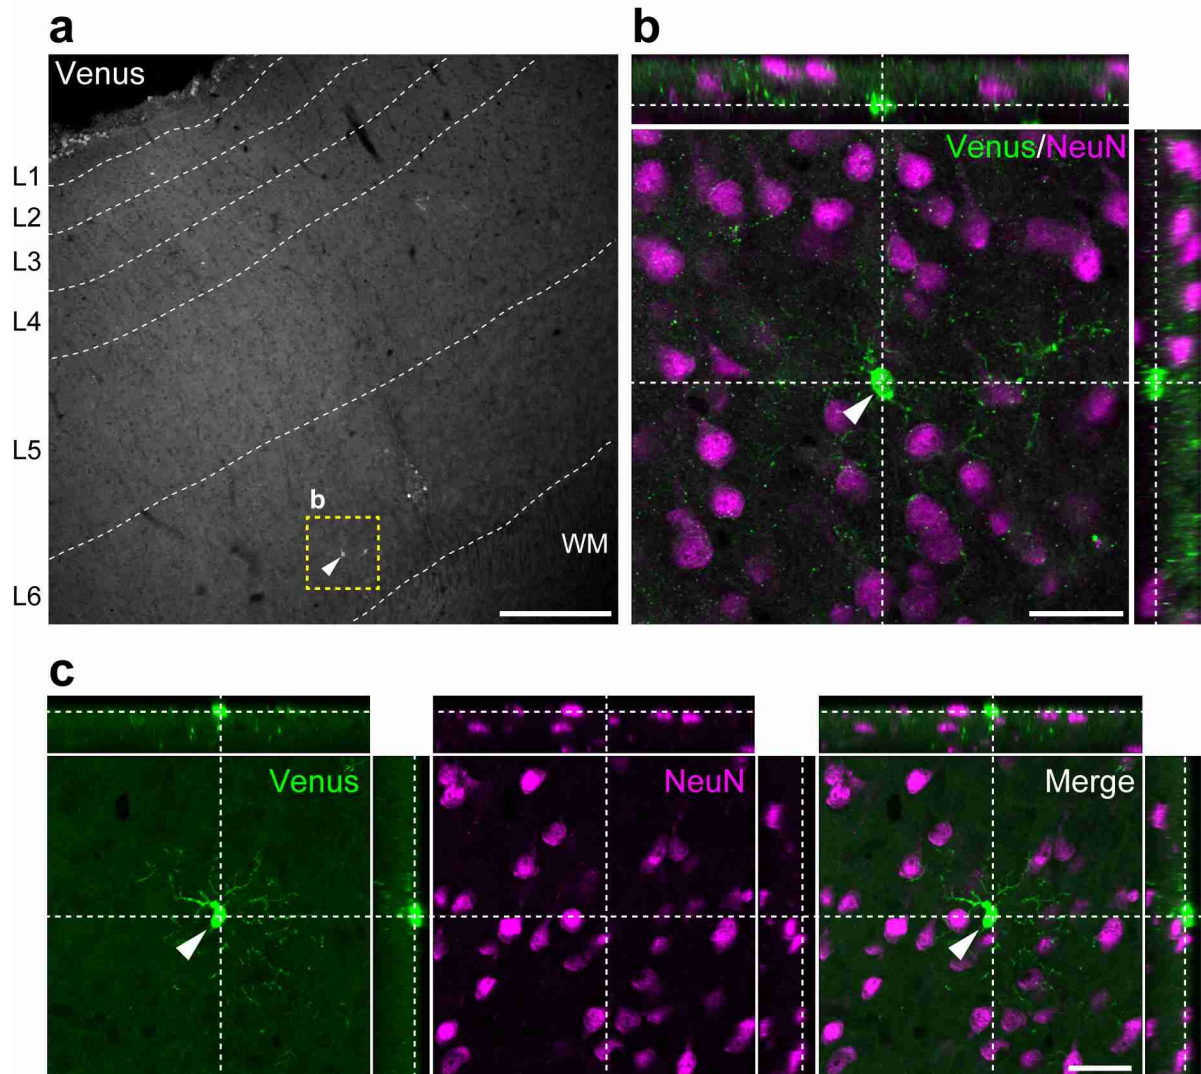

**Supplementary Figure S12. No expression of NeuN in new neurons derived from L1-INP cells.**

(a) The cell images were taken from layer 6 of the frontal cortex 4 weeks after 3 weeks-FLX treatments (15 mg/kg/day). L, layer. WM, white matter. (b) NeuN signals (magenta) were hardly detected in Venus+ neurons by mouse monoclonal anti-NeuN antibody. (c) Sections were stained with rabbit polyclonal anti-NeuN antibody, but no venus-expressing neurons expressed NeuN. Scale bars, 250  $\mu$ m (a), 30  $\mu$ m (b, c).

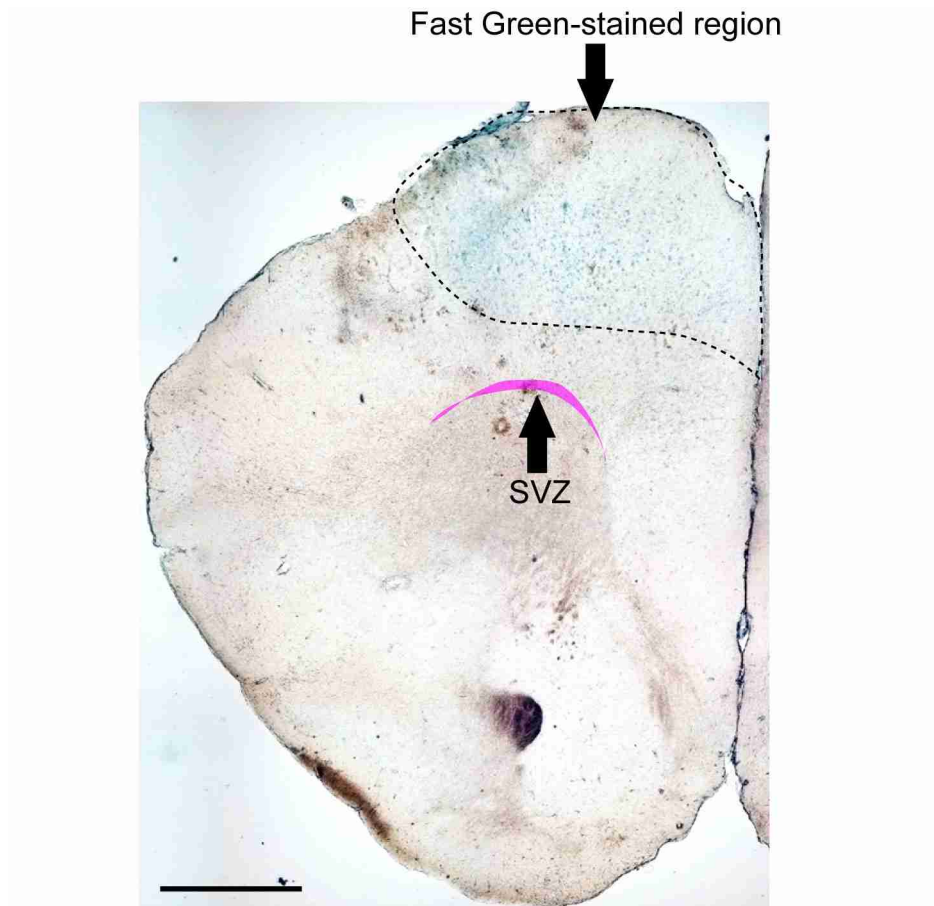

**Supplementary Figure S13. The regions stained with Fast Green.**  
A representative Fast Green-stained region was outlined by a dotted line.  
The SVZ was indicated by magenta. Scale bar, 1 mm.

### Supplementary Table S1

Phenotypes of Venus+ neurons in the somatosensory cortex

| Periods after the FLX treatments | Labeling percentages of the markers expressed in Venus+ cells |                  |
|----------------------------------|---------------------------------------------------------------|------------------|
|                                  | 4 weeks                                                       | 8 weeks          |
| GABA                             | 78 ± 6.1 (28/37)                                              | 81 ± 7.0 (19/24) |
| CR                               | 45 ± 6.8 (17/38)                                              | 54 ± 8.1 (11/20) |
| NPY                              | 7.9 ± 3.2 (4/33)                                              | 19 ± 5.9 (5/18)  |
| SOM                              | 4.6 ± 2.9 (2/36)                                              | 7.6 ± 4.0 (2/19) |
| CB                               | 0 (0/33)                                                      | 0 (0/15)         |
| PV                               | 0 (0/41)                                                      | 0 (0/25)         |
| S100β                            | 0 (0/36)                                                      | 0 (0/18)         |
| Olig2                            | 0 (0/30)                                                      | 0 (0/21)         |
| Iba1                             | 0 (0/34)                                                      | 0 (0/19)         |

Data are presented as means ± SEM from four mice at each time-point. The denominator and numerator mean the number of total Venus+ cells and that of marker+/Venus+ cell in the somatosensory cortex, respectively, in parentheses (one-way ANOVA and Scheffé's *post hoc* test, all  $P > 0.05$ ). However, there was no significant difference between the values of each marker at 4 and 8 weeks. CR, calretinin. NPY, neuropeptide Y. SOM, Somatostatin. CB, calbindin. PV, parvalbumin. S100β, S100 calcium binding protein β. Olig2, Oligodendrocyte transcription factor 2. Iba1, ionized calcium binding adaptor molecule 1.



### Supplementary Table S2

Number of layer 2–6 Venus+ cells and labeling efficiency  $r$  in the frontal cortex of each mouse

| Weeks            | 1           | 2           | 4           | 8           |
|------------------|-------------|-------------|-------------|-------------|
| Control mice     | 3.37, 0.186 | 2.18, 0.157 | 2.23, 0.108 | 1.75, 0.093 |
|                  | 2.56, 0.211 | 2.01, 0.150 | 1.43, 0.103 | 1.23, 0.119 |
|                  | 3.20, 0.154 | 2.73, 0.121 | 1.75, 0.153 | 3.20, 0.168 |
|                  | 2.59, 0.275 | 2.88, 0.184 | 2.26, 0.200 | 2.23, 0.103 |
| FLX-treated mice | 40.2, 0.146 | 30.9, 0.129 | 19.3, 0.167 | 13.1, 0.128 |
|                  | 47.2, 0.108 | 43.0, 0.107 | 31.3, 0.157 | 11.7, 0.193 |
|                  | 46.6, 0.182 | 32.3, 0.183 | 25.7, 0.126 | 13.4, 0.073 |
|                  | 35.5, 0.173 | 40.1, 0.145 | 27.4, 0.122 | 12.6, 0.169 |

Each cell represents ([number of layer 2–6 Venus+ neurons per mm<sup>3</sup>], [labeling efficiency  $r$ ]) for each mouse.
